# Supplementary material for: Decorated resol derived mesoporous carbon: highly ordered microstructure, rich boron incorporation, and excellent electrochemical capacitance
Source: Royal Society of Chemistry journal article supplement (doi:10.1039/c2ra22912a), 2013-01-01
Supplement: c2ra22912a.pdf [file c2ra22912a.pdf]

## Electronic supplementary information for

# Decorated resol derived mesoporous carbon: highly ordered microstructure, rich boron incorporation, and excellent electrochemical capacitance

*Xiaochen Zhao,<sup>a,e</sup> Qiang Zhang,<sup>b</sup> Bingsen Zhang,<sup>c</sup> Cheng-Meng Chen,<sup>d</sup> Jinming Xu,<sup>a,e</sup> Aiqin Wang,<sup>a</sup> Dang Sheng Su,<sup>\*c</sup> Tao Zhang<sup>\*a</sup>*

<sup>a</sup> State Key Laboratory of Catalysis, Dalian Institute of Chemical Physics, Chinese Academy of Science, PO Box 110, Dalian, 116023, P. R. China. E-mail: [taozhang@dicp.ac.cn](mailto:taozhang@dicp.ac.cn)

<sup>b</sup> Beijing Key Laboratory of Green Chemical Reaction Engineering and Technology, Department of Chemical Engineering, Tsinghua University, Beijing 100084, P. R. China.

<sup>c</sup> Shenyang National Laboratory for Materials Science Institute of Metal Research, Chinese Academy of Sciences, 72 Wenhua Road, Shenyang 110016, P. R. China E-mail: [dssu@imr.ac.cn](mailto:dssu@imr.ac.cn)

<sup>d</sup> Key Laboratory of Carbon Materials, Institute of Coal Chemistry, Chinese Academy of Sciences, Taoyuan South Road 27, Taiyuan 030001, P.R. China

<sup>e</sup> Graduate University of Chinese Academy of Science, Beijing 100049, P. R. China.

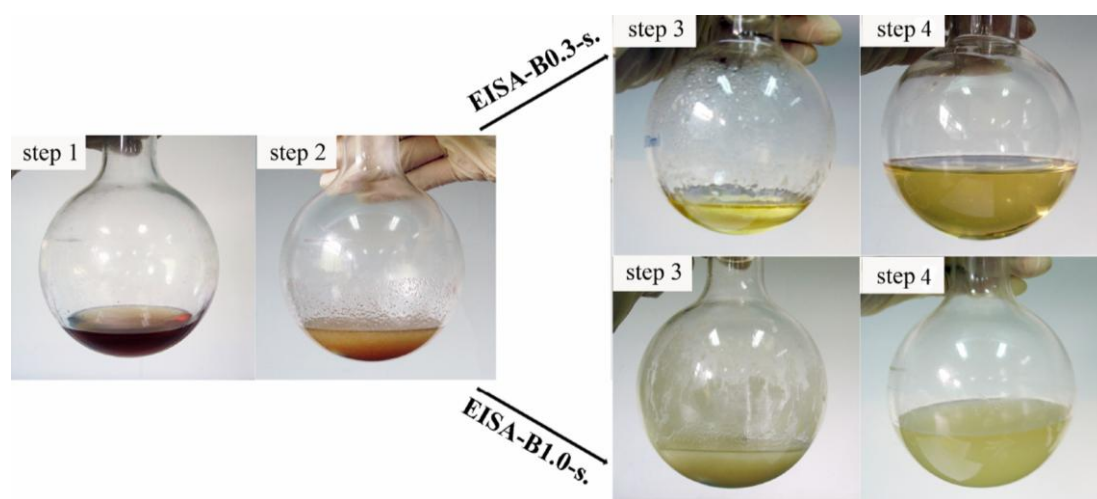

**Fig. S1** The photographs of synthesizing B-modified resol with different B additions: *step 1* showed water-free monomethylol phenols, *step 2* showed the mixture of boric acid and water-free monomethylol phenols, *step 3* showed the pre-polymerized B-modified resol after dehydration at the temperature of 120°C and *step 4* showed the diluted solution of B-modified resol in water free ethanol. The images of B0.3-OMC in step3-4 is transparent, while that of B1.0-OMC is turbid indicate that when the ratio of B to phenol is 0.3, all boric acid added were reacted and formed a homogeneously B-modified resol; however, when the ratio increased to 1.0, the boric acid is obviously overdosed, resulting a mixture of un-reacted boric acid and B-modified resol in a turbid appearance.

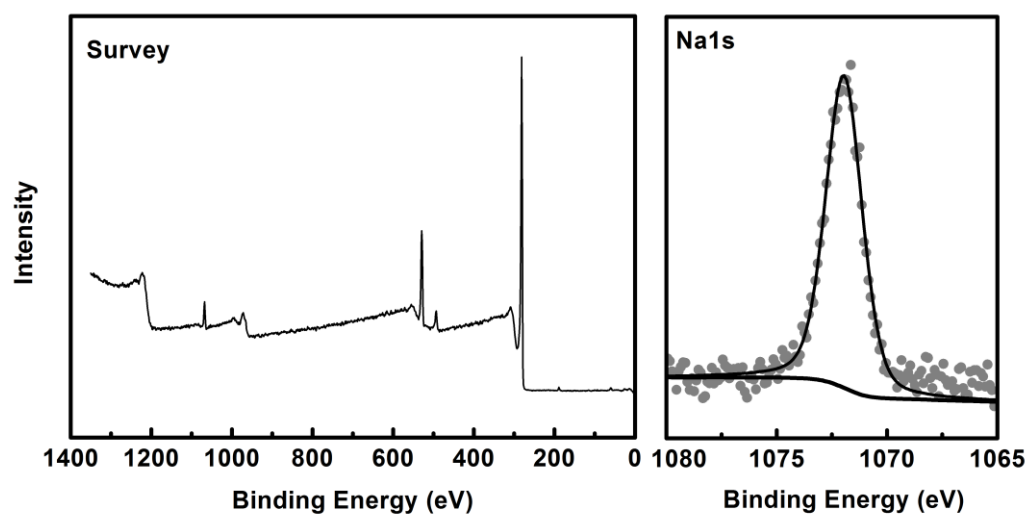

**Fig. S2** Survey analysis and Na 1s fine scanning XPS spectra of B0.3-OMC.

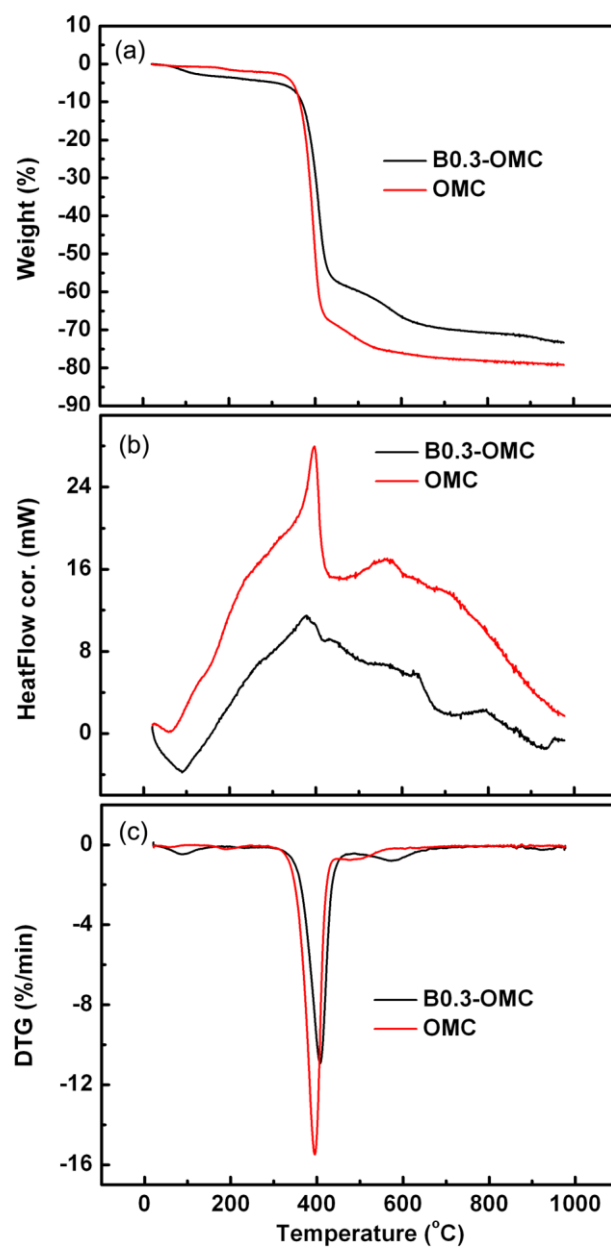

**Fig. S3** TGA analysis of B0.3-OMC and OMC precursor in nitrogen at a rate of 10 °C/min: (a) TG profiles, (b) heat flow profiles, and (c) DTA curves.

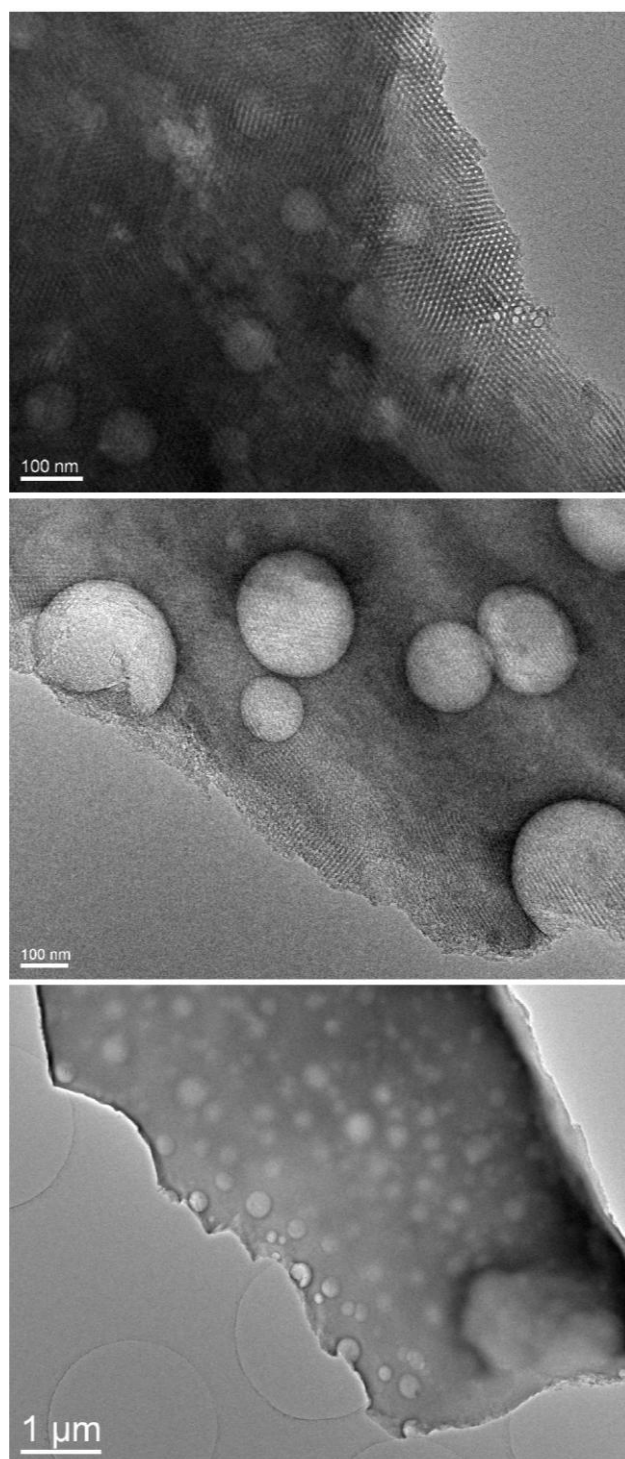

**Fig. S4** TEM images of B0.3-OMC in different scales.

**Table S1** Comparison of the structural parameters, the B contents and the specific capacitance of B modified mesoporous carbon obtained via different strategies.

| Sample                 | S <sub>BET</sub><br>m <sup>2</sup> /g | V <sub>p</sub><br>m <sup>3</sup> /g | D <sub>p</sub><br>nm | a <sub>0</sub><br>nm | B <sub>cont.</sub><br>wt% | Order | C<br>F/m <sup>2</sup> | C<br>F/g |
|------------------------|---------------------------------------|-------------------------------------|----------------------|----------------------|---------------------------|-------|-----------------------|----------|
| OMC                    | 694                                   | 0.48                                | 3.4                  | 10.3                 | --                        | Y     | 0.19                  | 132      |
| B0.1-OMC               | 551                                   | 0.41                                | 3.6                  | 10.3                 | 0.67                      | Y     | 0.29                  | 160      |
| B0.3-OMC               | 462                                   | 0.36                                | 3.7                  | 10.5                 | 1.01                      | Y     | 0.38                  | 176      |
| B0.6-OMC               | 314                                   | 0.25                                | 3.7                  | 10.5                 | 1.35                      | Y     | 0.39                  | 122      |
| B1.0-OMC               | 357                                   | 0.31                                | 3.8                  | 10.6                 | 1.64                      | Y     | 0.35                  | 125      |
| OMC <sup>[1]</sup>     | 660                                   | 0.41                                | 6.28                 | NA                   | --                        | Y     | NA                    | --       |
| BMC-I <sup>[1]</sup>   | 383                                   | 0.23                                | 7.54                 | NA                   | 0.24                      | Y     | NA                    | --       |
| BMC-II <sup>[1]</sup>  | 261                                   | 0.15                                | NA                   | NA                   | 0.30                      | Y     | NA                    | --       |
| BMC-III <sup>[1]</sup> | 277                                   | 0.21                                | NA                   | NA                   | 1.12                      | N     | NA                    | --       |
| OMC <sup>[2]</sup>     | 702                                   | 0.63                                | 4.7                  | 10.5                 |                           | Y     | 0.16                  | 112      |
| BMC-I <sup>[2]</sup>   | 707                                   | 0.58                                | 4.9                  | 10.9                 | 0.22                      | Y     | 0.16                  | 113      |
| BMC-II <sup>[2]</sup>  | 707                                   | 0.60                                | 5.0                  | 11.8                 | 0.32                      | Y     | 0.19                  | 134      |
| BMC-III <sup>[2]</sup> | 641                                   | 0.56                                | 4.9                  | 12.2                 | 0.56                      | Y     | 0.21                  | 135      |
| OMC <sup>[3]</sup>     | 620                                   | 0.55                                | NA                   | NA                   | 0                         | Y     | 0.14                  | 87       |
| BMC-I <sup>[3]</sup>   | 660                                   | 0.54                                | NA                   | NA                   | 0.065                     | Y     | 0.17                  | 112      |
| BMC-II <sup>[3]</sup>  | 470                                   | 0.49                                | NA                   | NA                   | 0.16                      | N     | 0.21                  | 99       |

## References

- [1] X. Zhai, Y. Song, L. Zhi, J. Shi and Q. Guo, *New Carbon Materials*, 2011, **26**, 211-216.
- [2] X. C. Zhao, A. Q. Wang, J. W. Yan, G. Q. Sun, L. X. Sun and T. Zhang, *Chem Mater.*, 2010, **22**, 5463-5473.
- [3] D. W. Wang, F. Li, Z. G. Chen, G. Q. Lu and H. M. Cheng, *Chem Mater.*, 2008, **20**, 7195-7200.
